# Supplementary material for: LC-HRMS studies on ruxolitinib degradation: a comprehensive approach during drug development
Source: Royal Society of Chemistry journal article supplement (doi:10.1039/d1ay01915e), 2021-12-21
Supplement: d1ay01915e1.pdf [file d1ay01915e1.pdf]

**SUPPLEMENTARY DATA**

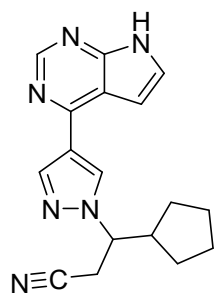

**Figure S-I** Structure of Ruxolitinib

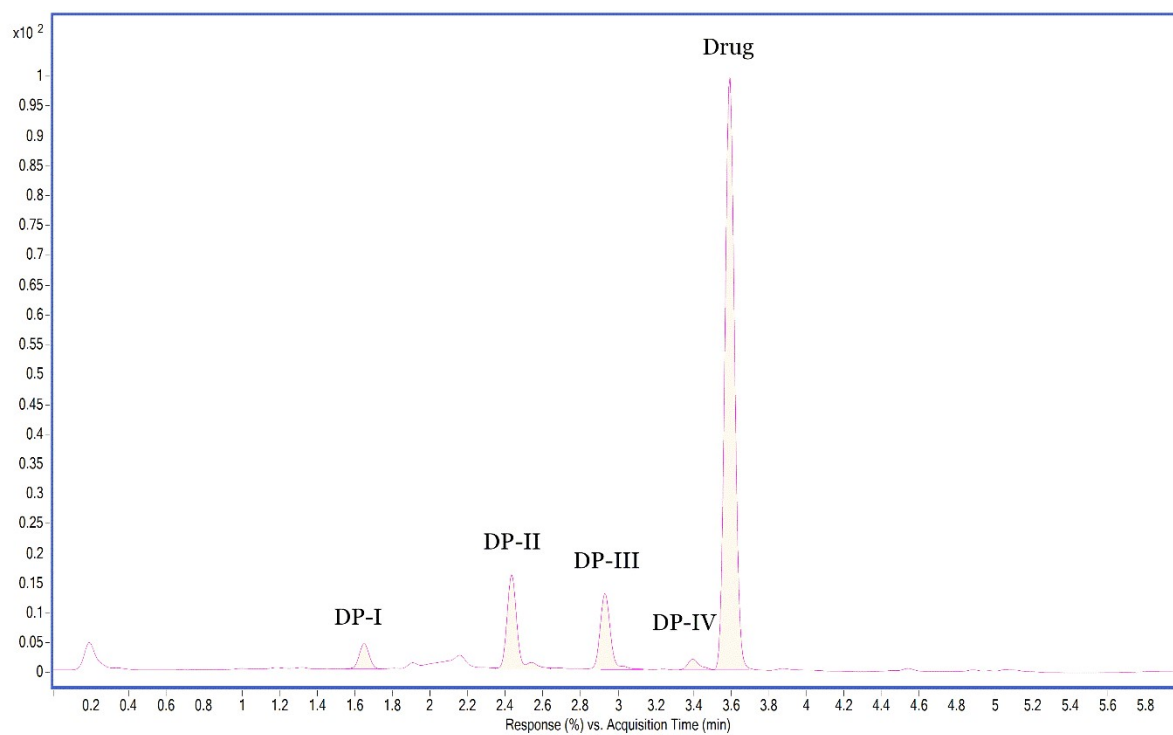

**Figure S-II** UHPLC chromatogram showing separation of Drug and DPs

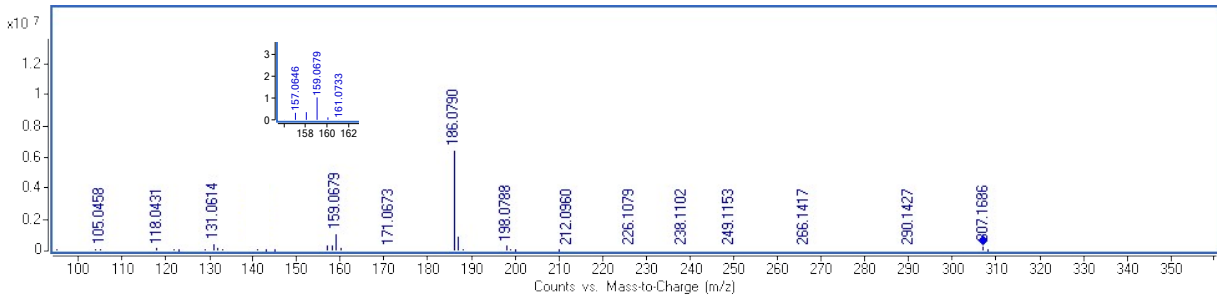

|                       |                  |                  |                  |                  |                  |                  |
|-----------------------|------------------|------------------|------------------|------------------|------------------|------------------|
| 307.1686 (Parent ion) | 249.1153 (minor) | 212.0960 (major) | 171.0673 (minor) | 159.0679 (major) | 133.0609 (minor) | 122.0973 (minor) |
| 290.1427 (minor)      | 238.1102 (minor) | 198.0788 (major) | 169.0528 (minor) | 157.0646 (major) | 132.0578 (minor) | 118.0431 (minor) |
| 266.1417 (minor)      | 226.1079 (minor) | 186.0790 (major) | 161.0733 (major) | 142.0522 (major) | 131.0614 (major) | 105.0458 (major) |

**Fragment List**

**Figure S-III** Line spectra of drug obtained through LC-QTOF study

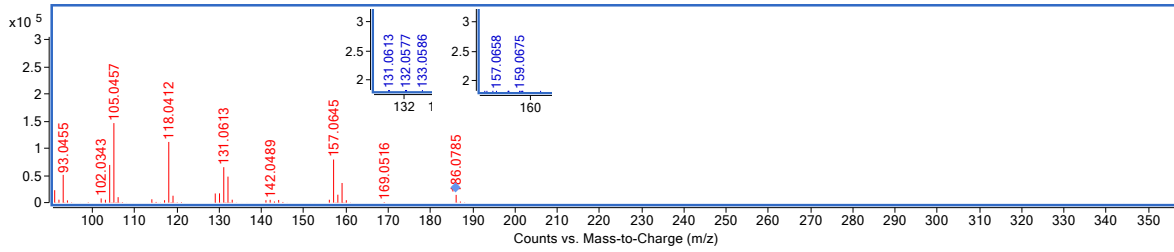

**Fragment List**

|                      |                 |                 |
|----------------------|-----------------|-----------------|
| 186.0785(Parent ion) | 142.0489(major) | 105.0457(major) |
| 169.0516(major)      | 131.0613(major) | 102.0343(major) |
| 157.0645(major)      | 118.0412(major) | 93.0455 (major) |

**Figure S-IV** MS/MS spectra of DP-I.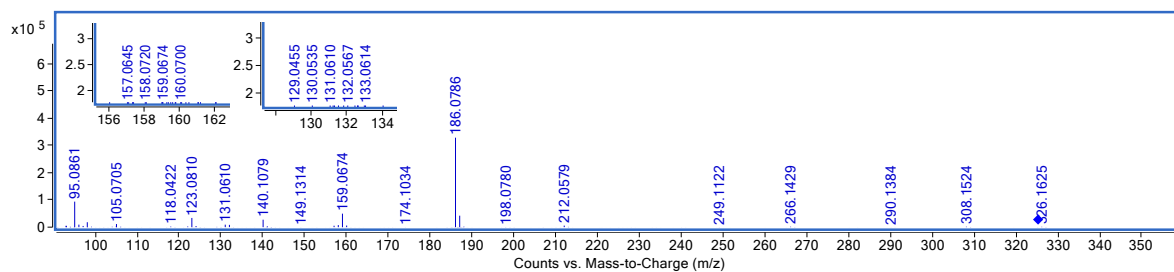

**Fragment List**

|                       |                  |                  |                  |                  |                  |
|-----------------------|------------------|------------------|------------------|------------------|------------------|
| 326.1625 (Parent ion) | 266.1429 (major) | 198.0780 (major) | 159.0674 (major) | 131.0610 (major) | 105.0705 (major) |
| 308.1524 (major)      | 249.1122 (minor) | 186.0786 (major) | 149.1314(major)  | 123.0810 (major) | 95.0861 (major)  |
| 290.1384 (major)      | 212.0579 (major) | 174.1034 (major) | 140.1079 (major) | 118.0422 (major) |                  |

**Figure S-V** MS/MS spectra of DP-II.

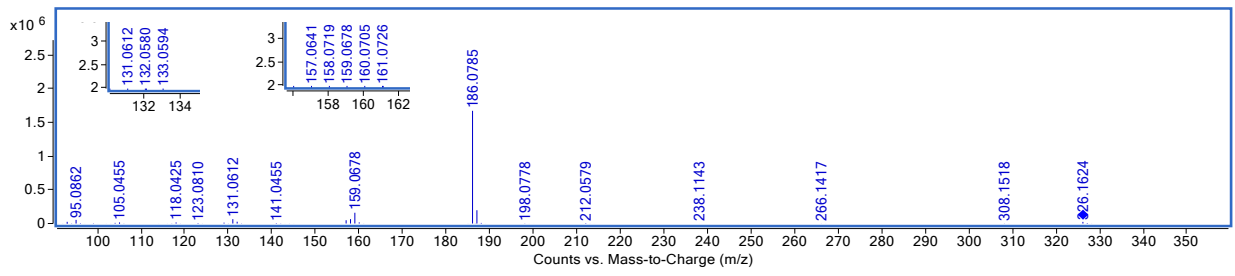

|                      |                 |                 |                 |                 |
|----------------------|-----------------|-----------------|-----------------|-----------------|
| 325.1771(Parent ion) | 238.1143(major) | 186.0785(major) | 131.0612(major) | 105.0455(minor) |
| 308.1518(minor)      | 212.0579(major) | 159.0678(major) | 123.0810(minor) | 95.0862(minor)  |
| 266.1417(major)      | 198.0778(minor) | 141.0455(major) | 118.0425(minor) |                 |

Figure S-VI MS/MS spectra of DP-III.

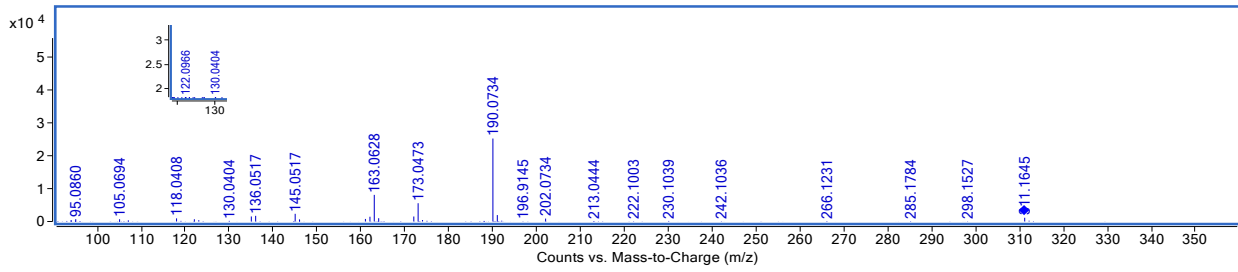

**Fragment List**

|                      |                 |                 |                 |                 |                 |                |
|----------------------|-----------------|-----------------|-----------------|-----------------|-----------------|----------------|
| 311.1645(Parent ion) | 266.1231(major) | 222.1003(minor) | 196.9145(minor) | 163.0628(major) | 130.0404(major) | 95.0860(major) |
| 298.1527(minor)      | 242.1036(major) | 213.0444(minor) | 190.0734(major) | 145.0517(major) | 118.0408(major) |                |
| 285.1784(minor)      | 230.1039(major) | 202.0734(major) | 173.0473(major) | 136.0517(major) | 105.0694(major) |                |

**Figure S-VII** MS/MS spectra of DP-IV.

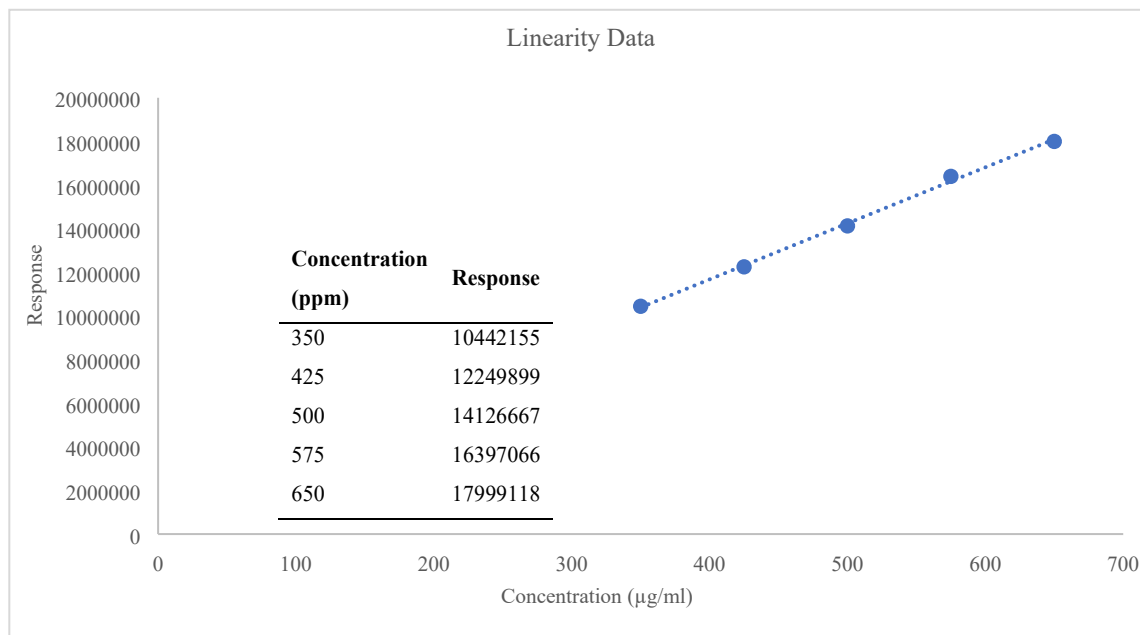

**Figure S-VIII** Linearity of Ruxolitinb

**Table S-I** Recovery data for accuracy studies

| Spiked concentration (µg/ml) | Calculated spiked concentration (µg/ml) | Recovery (%) |
|------------------------------|-----------------------------------------|--------------|
| 250                          | 252.7695                                | 101.11       |
| 500                          | 497.7357                                | 99.55        |
| 650                          | 647.3528                                | 99.59        |

**Table S-II** Inter-day& Intra-day precision

| S.No        | Area-Day1 (Repeatability) | Area-Day2 (Intraday Reproducibility) |
|-------------|---------------------------|--------------------------------------|
| 1           | 21743617                  | 18461460                             |
| 2           | 21816750                  | 18663374                             |
| 3           | 21855636                  | 18913057                             |
| 4           | 21827007                  | 18683340                             |
| 5           | 21832683                  | 18804814                             |
| 6           | 21819140                  | 18708382                             |
| <b>Mean</b> | <b>21815806</b>           | <b>18705738</b>                      |
| <b>SD</b>   | <b>34689.05</b>           | <b>138306.6</b>                      |
| <b>%RSD</b> | <b>0.16</b>               | <b>0.74</b>                          |

**Table S-III** In silico toxicity prediction profile of drug and DPs through webserver (a) preADMET and (b) PROTOX-II.

| Toxicity Description ID | Predicted Toxicity Value |
|-------------------------|--------------------------|
|                         |                          |

|                                              | <b>Ruxolitinib</b> | <b>Value for comparison with impurity<sup>#</sup></b> | <b>DP-I</b> | <b>DP-II</b> | <b>DP-III</b> | <b>DP-IV</b> |
|----------------------------------------------|--------------------|-------------------------------------------------------|-------------|--------------|---------------|--------------|
| <b>Ames_test<sup>a</sup></b>                 | Mutagen            | Mutagen                                               | Mutagen     | Mutagen      | Mutagen       | Mutagen      |
| <b>Hepatotoxicity<sup>b</sup></b>            | Inactive           | Inactive                                              | Active      | Active       | Active        | Inactive     |
| <b>Carcinogenicity<sup>b</sup></b>           | Inactive           | Inactive                                              | Inactive    | Active       | Inactive      | Active       |
| <b>Immunotoxicity<sup>b</sup></b>            | Inactive           | Inactive                                              | Inactive    | Inactive     | Inactive      | Inactive     |
| <b>Mutagenicity<sup>b</sup></b>              | Inactive           | Inactive                                              | Inactive    | Inactive     | Inactive      | Active       |
| <b>Cytotoxicity<sup>b</sup></b>              | Inactive           | Inactive                                              | Inactive    | Inactive     | Inactive      | Inactive     |
| <b>Carcino_Mouse<sup>a</sup></b>             | Negative           | Negative                                              | Negative    | Negative     | Negative      | Negative     |
| <b>Carcino_Rat<sup>a</sup></b>               | Negative           | Negative                                              | Negative    | Negative     | Negative      | Negative     |
| <b>PPAR-Gamma<sup>b</sup></b>                | Inactive           | Inactive                                              | Inactive    | Inactive     | Inactive      | Inactive     |
| <b>ATAD5<sup>b</sup></b>                     | Inactive           | Inactive                                              | Inactive    | Inactive     | Inactive      | Inactive     |
| <b>hERG_inhibition<sup>a</sup></b>           | Medium risk        | Medium risk                                           | Medium risk | Medium risk  | Medium risk   | Medium risk  |
| <b>TA100_10RLI<sup>a</sup></b>               | Negative           | Negative                                              | Negative    | Positive     | Negative      | Negative     |
| <b>TA100_NA<sup>a</sup></b>                  | Negative           | Negative                                              | Negative    | Negative     | Negative      | Negative     |
| <b>TA1535_10RLI<sup>a</sup></b>              | Negative           | Negative                                              | Positive    | Negative     | Negative      | Positive     |
| <b>TA1535_NA<sup>a</sup></b>                 | Positive           | Positive                                              | Positive    | Positive     | Positive      | Positive     |
| <b>Predicted LD<sub>50</sub><sup>b</sup></b> | 800 mg/kg          | -                                                     | 1000 mg/kg  | 800 mg/kg    | 800 mg/kg     | 839 mg/kg    |

<sup>#</sup> As per the ICH guideline the identification threshold and qualification threshold is coming 0.1% and 0.15%, respectively based on dose of Ruxolitinib. Thus, it is assumed that no degradation product would cross the specification >0.5%. The impurity level would be 200 times lower than the API level and the correction with 200 times was applied for comparative qualitative data.

According to PreADMET it was interpreted that the impurities have almost similar safety profile as compared to API except TA1535\_10RLI and TA100\_10RLI.

While mutagenicity according to PreADMET could not be compared, as the drug and DPs both were shown to be a mutagen. Hence PROTOX-II was used, in which DP-IV was found to be mutagenic.
